# Supplementary material for: Identifying predictors of cognitive decline in long-term care: a scoping review
Source: BMC Geriatr. 2023 Sep 5;23:538. doi: 10.1186/s12877-023-04193-6 (PMC10478432; doi:10.1186/s12877-023-04193-6)
Supplement: Supplementary file 1 — Supplementary Material 1: Additional file 1 is an excel document containing the Medline search strategy along with the data extraction table from which final results were derived. [file 12877_2023_4193_MOESM1_ESM.xlsx]

## Sheet: Sample Medline Search
Additional File: Sample Medline Search Conducted on June 27th, 2022
1. long term care/
2. ((longterm or long-term) adj1 care).ti,ab.
3. nursing homes/
4. (nursing adj2 (home* or facilit*)).ti,ab.
5. homes for the aged/
6. (assisted-living adj1 (home* or facilit*)).ti,ab.
7. cognitive dysfunction/ - 23599
8. ((cogniti* or mental* or neurocognit*) adj2 (decline or dysfunction or deteriorat* or impair* or defect or diminish*)).ti,ab.
9. 1 or 2 or 3 or 4 or 5 or 6
10. 7 or 8
11. 9 and 10
12. limit 11 to yr="2000 -Current"

## Sheet: Data Extraction Table
Additional File: Data extraction chart
First Author & Publication Date	Sample Size	Country	Objectives	Factors Examined in Relation to Cognitive Decline	Study Type	Inclusion criteria	Exclusion criteria	Study Recruitment Time Period	Duration of Follow-up	Loss to follow up/Missing Data	Participant Baseline Age (Years)	Participant Sex	Proportion of participants with dementia at baseline	Participant Cognitive Status at Baseline	Type of Tool Assessing Cognition	Definition of Change in Cognition	Frequency of Cognitive Assessment	Number of Cognitive Assessments Per Person	Administrator of Cognitive Assessment	Method of Assessing Cognitive Trajectory Changes	Multivariate (MV) or Bivariate (BV) Predictor Analysis	Results
Bali 2016	1081	USA	To evaluate the risk of cognitive decline associated with paroxetine use in elderly nursing home patients with depression, in comparison to other SSRI use	SSRI use - Paroxetine or other SSRI	Retrospective cohort	Long-term nursing home resident, age 65+, diagnosed with depression, initiated SSRI after a 6-month washout period, continuously eligible for Medicare in 6 months baseline and 1 year follow-up, noncomatose, not diagnosed with dementia at baseline	No quarterly assessments during follow-up for outcome assessment, gap >568 days betwteen last admission and first annual assessment	Used 2007-2010 MDS data	1 year	Excluded if follow-up not complete	Mean age paroxetine users: 81.3 SD 9.4 Mean age other SSRI users: 80.4 SD 9.8	30% female	0	Paroxetine Mean MDS: 2.02 SD 1.85 Other SSRI Mean MDS: 2.50 SD 2.39	MDS Cognition Scale	Change in MDS Cognition Scale score from baseline to follow-up	Quarterly	NR	NR	Repeated measures mixed model analysis	Paroxetine use vs. other SSRI: (MV)	No Association: Paroxetine use compared to other SSRI
Benetos 2012	873	France & Italy	To evaluate the influence of arterial stiffness on cognitive decline in institutionalized subjects older than 80 years	Carotid-femoral pulse wave velocity (PWV), an indicator of aortic stiffness. Clinical and 3-day self-measurements of blood pressure (BP)	Prospective cohort	Aged 80 years and older, were institutionalized, and if they signed the informed consent form	Participants were excluded if they had severe dementia [Mini Mental Status Examination (MMSE) <12], a low level of autonomy [activity of daily living (ADL) ≤2] or were under guardianship or ‘a measure of legal protection’	NR	1 year	Excluded if no follow-up after baseline	Mean age 87 SD 5	79% female	0.16	Mean MMSE 23.7 SD 4.9	MMSE	Difference in MMSE score from baseline to follow-up	Annually	2	NR	Univariate analysis, ANOVA	Increased arterial stiffness: (MV) Blood pressure: (MV)	Risk Factors: Increased pulsewave velocity, as a marker for arterial stiffness, was associated with cognitive decline. No association: Blood pressure
Bidzan 2008	26	Poland	To investigate how aggressive and impulsive behaviors correlate with the progression of dementia and related cognitive impairments in Alzheimers patients	Aggressive and impulsive behaviour as measured by the Cohen-Mansfield Agitation Inventory (CMAI)	Prospective cohort	Nursing home residents diagnosed with Alzheimers dementia	• Current or past history of affective disorder, schizophrenia, alcoholism, addiction to any psychoactive substance, epilepsy, Parkinson’s Disease, or mental retardation; • Any impairments of consciousness or awareness at the time of the clinical evaluation; • Locomotor impairments or impairments of vision or hearing that could impair the participant’s ability to follow the instructions for a cli…	Sep 2005 to Dec 2007	22 to 26 months	13 individuals lost to to follow-up due to death or significant deterioration of somatic state	Mean age 77.38	NR	1	Mean ADAS-cog score 22.13 SD 5.8	ADAS-cog	Mean difference in ADAS-cog score from baseline to follow-up	NR	2	NR	Descriptive comparison of rates; t-test and Mann Whitney U for bivariate analysis	Aggressive and impulsive behaviour: (BV)	Risk Factors: Aggressive and impulsive behaviour at baseline, as measured by the CMAI
Boockvar 2013	136	USA	To describe the relationship between delirium and other complications of acute illness, including cognitive decline	Delirium	Prospective cohort	Nursing home residents receiving opioids, antidepressants, or antipsychotics on a routine basis, who did not have an acute medical illness at time of screening, who at baseline were expected to remain in nursing home for at least 2 months, who subsequently developed an acute illness	None reported	NR	Mean follow-up 11.7 months SD 10.8	Not reported	Mean age 76.2 years SD 11.7	40% female	NR	Mean MDS-CPS 1.0 SD 1.4	MDS-CPS	Change in cognition between acute illness onset and end, or pre-illness to either acute illness onset or end	NR	NR	NR	Bivariate generalized regression model	Delirium: (MV)	Risk Factors: Delirium.
Bourgeois 2015	226	Belgium	To examine differences in cognition over one year between BZD/Z users (benzodiazepine and related Z-drugs) compared to non-users, as well as to explore other factors associated with declines in cognition	Chronic benzodiazepine and other z-drug use, defined as use at bedtime for at least 3 months.	Prospective cohort	All cognitively capable residents of 10 Belgian nursing homes, MMSE score of at least 18 out of 30 at baseline	Residents only using sedative antidepressants trazodone, mirtazapine, or phytotherapy as a sleep medication, residents using BZDs for anxiety	January 2011 to January 2012	12 months	Individuals with no follow-up data were excluded	Mean age BZD/Z group: 85.3 years Mean age control group: 85 years	BZD/Z group = 75.6% female Control group = 78.9% female	NR	BZD/Z Group Mean MMSE: 23.9 Control Group Mean MMSE: 24.2	MMSE	MMSE decrease of ≥4 points at one year	Annual	2	NR	Bivariate statistical tests and multivariable logistic regression to examine predictors of decrease ≥4 points	BZD/Z-drug use: (MV)	Not associated: BZD/Z drug use
Burfield 2012	56494	USA	To examine the relationship between cognition and pain in an elderly long-term care population	Pain	Retrospective cohort	Residents of Medicare-receiving nursing home aged ≥ 65 years with annual MDS assessments available	Missing MDS entry dates, discharged or transferred residents, and comatose subjects	Data collected from 2001-2003 inclusive	3 years	Excluded if follow-up assesssment not available	Mean age 83 SD 8.2	80% female	NR	Mean MMSE 14.51 SD 7.88	MDS CPS converted to MMSE	Change in MMSE score from baseline to follow-up	Annual	3	NR	ANOVAs and covariance models	Pain: (MV)	No Association: Findings showed a gradual decline in recorded pain as cognition also declined over the 3 year period, however, very little association was found between cognition and pain variables, regardless of the time interval. The sample data do not confirm the presence of concomitance between pain and cognition in this long-term care population.
Buttar 2003	1304	USA	To evaluate if residents with severe cognitive impairment (SCI) as identified by the Cognitive Performance Scale tend to have comorbid conditions and clinical characteristics that distinguish them from residents with less severe or no cognitive impairment. Further, to assess whether once residents are classified with SCI using the CPS, if they continue to be classified as such (i.e., trajectory o…	ADL function Antidepressant medication Falls in past 6mo Alzheimer's disease Unspecified dementia Incontinence Pressure ulcers Delirium Age Sex Tube feeding Decreased oral intake Caucasian race Marital status Medicaid Living alone before admission Presence of living will Do not resuscitate Moves independently indoors Stroke Parkinson's Disease Unstable cognition Physical aggression Behaviour prob…	Retrospective cohort	Severe cognitive impairment at baseline - CPS 5 or 6 Follow-up data at 6-months after baseline Length of stay of at least 60 days Age >65	None reported	1990-1991 and 1993	6 months	Excluded from analysis	Mean age 83 SD 8	82% female	79% AD + other dementia	Not reported	RAI-MDS CPS	Improvement in CPS by at least 1 point	6 months	2	NR	Multinomial logistic regression model	ADL independence: (MV) Antidepressant use: (MV) History of falls: (MV) Alzheimer's disease: (MV) Other dementia: (MV) Incontinence: (MV) Gender: (MV) Age: (MV) Tube feeding: (MV) Decrased oral intake: (MV) Pressure ulcers: (MV) Delirium: (MV) Caucasian race: (BV) Marital status: (BV) Medicaid: (BV) Living alone before admission: (MV) Presence of living will: (BV) Do not resuscitate: (MV) Moves in…	Protective Factors: Higher ADL independence; antidepressant use, falls in the past 6 months Risk factors: Alzheimer's disease; other unspecified dementia; incontinence No association: Gender, age, tube feeding, decreased oral intake, pressure ulcers, delirium, race, marital status, Medicaid use, living alone before admission, having a living will, DNR order, moves independently indoors, stroke, P…
Chen 2014	1279	Taiwan	To explore cognitive decline among residents living in veteran homes and identify its risk factors	Age, cancer, chronic lung disease, ADL resource utilization subgroup, Resident Assessment Protocol (RAP) trigger for cognitive loss/dementia, sum of RAP triggers	Prospective cohort	Residents from 2 vetran homes aged 65+, single or widowed physically independant, and cognitively intact	State of advanced dementia at enrollment, had severe difficulties in communication, could not complete the evaluations for 18-month follow-up, or moved out of the facilities	Jan 2006 to Dec 2010	18 months	10 lost to follow-up & 7 with missing values were excluded before reaching final sample size of 1279; those with MDS COGS rated as severe-very severe were excluded from multivariable analysis, leaving analytic sample size of 1270	Mean age 83.2 SD 5.1	0% female	Dementia "diagnosed" by MMSE=191 Dementia as an "underlying disease"=89 n = 280 (21.9%)	Mean MMSE 23.9 SD 6.6	MDS COGS	Change in MDS COGS category from baseline to follow-up	Quarterly	6	Trained research staff	Univariate/bivariate analysis to narrow down predictors, then logistic regression	Higher RUG-III ADL scores: Risk factor (MV) RAP trigger for cognitive loss/dementia: Risk factor (MV) Increased number of RAP triggers: Risk factor (MV) Cancer: NS (MV) Chronic lung disease: NS (MV) Age: NS (BV) BMI: NS (BV) Weight: NS (BV) Height: NS (BV) Baseline cognition based on MDS COGS: NS (BV) MDS COGS Decline: NS (BV) MMSE score: NS (BV) Dementia based on MMSE: NS (BV) Depression based o…	Risk Factors: Participants with higher RUG-III ADL scores (indicates physical dependance), RAP triggers for cognitive loss/dementia, and a higher number of RAP triggers were all considered to display independent risk factors for cognitive decline. No Association: Cancer, chronic lung disease, age, BMI, weight, height, baseline cognition, MDS COGS decline, MMSE score, dementia diagnosed by MMSE, d…
Chen 2016	1248	Taiwan	To evaluate the prevalence of malnutrition and its impact on mortality, functional decline, and cognitive impairment amongst elderly residents in long-term care	Malnutrition	Prospective cohort	Residents of Veteran Homes in Taiwan ≥ 65 years old	Those moving out of the veteran home, admitted to other institutions, and those with missing data	2006-01-01	18 months	Those who were severely disabled at enrolment and could not complete the evaluations in the 18 months of follow-up were not included	Mean age 83.1 SD 5.1	0% female	Malnutrition group = 17.1% Non-malnutrition group = 5.5%	Malnutrition group = 47.4% cognitively intact Non-malnutrition group = 70.3% cognitively intact	CPS	Change in CPS score from baseline to follow-up	Quarterly	6	Research nurses	Mann-Whitney U test for non parametric variables, student t-test for parametric variables	Malnutrition: (MV)	Protective Factor: Malnutrition was associated with cognitive improvement
Chou 2022	9647	USA	To evaluate functional and cognitive outcomes in nursing home residents after suprapubic tube (SPT) placement	SPT placement Age Frailty Comorbidities	Retrospective cohort	Residents with recorded MDS 3.0 data who elected to receive SPT	None reported	2014-2016	18 months	Excluded	80.9 SD 8.1	22.7% female	0.29	Mean BIMS of 10.6 SD 4.7	BIMS	A change of 3-points in BIMS score between assessments	3 months	7	NR	ANOVA and generalized linear mixed effects models	Increasing age: (MV) Physical frailty: (MV) Comorbidities: (MV) SPT placement: (MV)	Risk factors: Increasing age and frailty No association: Comorbidities and SPT placement
Cole 2011	104	Canada	To determine the outcomes of subsyndromal delirium in a cohort of long-term care residents	Subsyndromal delirium	Prospective cohort	Long-term care residents age 65+ Residents were recruited who were representative of their institutions, by recruiting recent and more remote admissions from resident lists	Unable to communicate in English or French Primary nurse or research assistant did not have time to complete assessments Delirium core symptoms at baseline Residents who developed delirium during follow-up	July 2005 - February 2008	Median 23 weeks, IQR 19-24	Not reported	65-79 = 27.9% 80-89 = 48.1% ≥90 = 24.0%	55.8% female	0.471	MMSE 0-17: 13.4% MMSE 18-23: 35.6% MMSE 24-30: 51.0%	MMSE	Change in MMSE score from baseline to 6-month follow-up	Weekly	Median 23	Research Assistant	Adjusted linear regression	Subsyndromal delirium: (MV)	Risk Factors: Subsyndromal delirium, when defined as 2+ CAM core symptoms that didn't meet criteria for delirium and did not progress to delirium. No Association: Subsyndromal delirium, when defined as 1+ CAM core symptom that didn't meet criteria for delirium and did not progress to delirium.
Dutcher 2014	18950	USA	Measure the associations between medications commonly used in Alzheimer's disease and related dementias (ADRD) management and ADL functioning and cognition over time	Anti-dementia medications (ADMs) including acetylcholinesterase inhibitors and memantine, antipsychotics (typical and atypical), antidepressants, and mood stabilizers, sex as an effect modifier	Retrospective cohort	Medicare beneficiaries with newly diagnosed ADRD in 2007–08 who had resided in a NH during at least part of the 2-year study period	N/A	2006 to 2008	2 years	Excluded if no follow-up after baseline	Mean age 83.6 SD 7.8	75.5% female	1	Intact: 32.1% Mild impairment: 54.8% Severe impairment: 12.2% Missing: 0.8%	CPS	Difference in CPS from baseline to follow-up	Quarterly	Median of 3	NR	Repeated measures GLMs	Antidementia medication use: (MV) Antidepressant use: (MV) Antipsychotic use: (MV) Mood stabilizers: (MV)	Protective Factors: ADM, antidepressant, and antipsychotic use was associated with slower cognitive decline; sex did not modify this relationship. No Association: No relationship for mood stabilizers
Foebel 2016	532	Europe (Czech Republic, England, Finland, France, Germany, Isreal, Italy, and The Netherlands)	To explore antipsychotic (AP) medications and physical restraint use with their effects on physical and cognitive function in older nursing home residents with dementia	AP medications and physical restraints	Retrospective cohort	Remained in same nursing home for study period, those with dementia and receiving AP medications or physically restrained at the baseline assessment	Residents with schizophrenia, missing data at 6 months follow-up, missing information about functional ability, cognition, medications, restraints, and those maximally impaired in physical or cognitive function were excluded	NR	1 year	Excluded those with no follow-up	Mean age 83.7 SD 8.14	72% female	1	6.6% borderline impairment, 52.8% mild to moderate impairment, 40.6% severe impairment	CPS	Increase in 1 point or more on CPS	Quarterly	3	Trained assessors, usually nurses	Poisson log regression models	Physical restraint use: (MV) Antipsychotic medication use: (MV)	Risk Factors: The group restrained with both physical restraints and AP medications had the highest frequency of cognitive decline (40.0%). Concurrent use of AP medications and physical restraints increased the likelihood of cognitive decline, while physical restraint use alone was also significant. After adjustment, effect sizes were larger and physical restraint use became significant, while th…
Freeman 2017	111052	Canada	To describe the relationship between physical restraint use, antipsychotic medications, and social engagement as risk and protective factors for cognitive decline among LTC residents	Physical restraint use Antipsychotics Social engagement	Retrospective cohort	LTC residents newly admitted between 2005 and 2011	Comatose Estimated prognosis less than 6 months Received hospice care Diagnosis of schizophrenia or Huntington's chorea Delusions in past 7 days Hallucinations in past 7 days No follow-up assessment after admission assessment CHESS=5	2005-2011	3 months based on interval between admission and follow-up assessment	Individuals with no follow-up data were excluded	Mean age 82.9 SD 9.8	68.9% female	18.4% Alzheimer's disease 40.3% dementia other than Alzheimer's	Cognitively intact (CPS=0) 16.1% Mild/moderate cognitive impairment (CPS=1,2) 31.2% Moderate/severe cognitive impairment (CPS=3-6) 52.7%	CPS	Decline in cognition measured by change in CPS of at least 1 point between admission and follow-up assessment	Quarterly	2	Trained healthcare assessors, usually nurses	Multivariable logistic regression	Use of physical restraints: (MV) Higher social engagement: (MV) Antipsychotic edication use: (MV)	Risk Factors: 1+ physical restraint. Protective Factors: Moderate-high social engagement. No Association: Prescribed antipsychotic medications.
Gerstenecker 2014	33	USA	To compare patterns of performance on MMSE in nursing home residents and to examine difference in cognitive decline according to the presence of dementia and other clinical factors	Dementia Pain Weight loss Medical instability Delirium CPS score ADL function Number of diagnoses Number of medications	Prospective cohort	Residents in a nursing home with chart data indicating administration of the MMSE on at least 2 consecutive quarters	Residents with chart data unavailable	NR	1 year	Excluded if follow-up not available	Mean age 77.2 SD 11.6	63.6% female	0.394	Mean MMSE 19.2 SD 6.9	MMSE	Change in MMSE score by 3 or more points over the course of consecutive administrations	Quarterly	2021-02-04	Social services staff	Paired sample t-tests (first vs final MMSE), independent t-tests (dementia vs non dementia residents), Chi square tests (to test significance of several resident characteristics in relation to MMSE)	Dementia: (BV) Pain: (BV) Weight loss: (BV) Medical instability: (BV) Delirium: (BV) CPS score: (BV) ADL function: (BV) Number of diagnoses: (BV) Number of medications: (BV)	No Association: The presence or absence of declining performance did not differ statistically based upon dementia status, pain, weight loss, medical instability, delirium, CPS score, ADL functioning, number of medical diagnoses, or number of prescribed medications.
Gracner 2021	20698	USA	To examine whether there are changes in cognitive function before vs after infection related hospitalizations among NH residents	Infection-related hospitalizations	Retrospective cohort	US nursing home residents aged 65 years or older who had experienced an infection-related hospitalization and had at least 2 quarterly MDS assessments before and 4 or more after the infection-related hospitalization	Hospital-acquired infections	Jan 2011 to Dec 2017	1 year	Excluded if follow-up not available	Mean age 82 SD 8.5	71% female	0.734	Mean CFS 2.17	Cognitive Function Scale	Change in CFS from baseline to follow-up	Quarterly	6 (2 pre-infection, 4 post-infection)	NR	Linear regression	Infection-related hospitalization: (MV)	Risk Factors: Infection-related hospitalization associated with higher rates of cognitive decline when compared to pre-hospitalization cognitive trajectories. The decline was greater for those with ADRD, sepsis, age 85+
Greco 2021	152	Italy	To evaluate the changes in frailty status and in physical and cognitive performance in relation to SARS-Cov-2 infection in nursing home residents	SARS-CoV-2 infection	Case control	Cases must have contracted SARS-CoV-2 and were residents in the nursing home, while controls were matched to the cases by age ± 3 years	None reported	Cases recruited if infected from March 2020-May 15, 2020	92 days SD 10	20 deaths, reducing sample to 132	Mean age cases = 84.4 SD 7.3 Mean age controls = 85.1 SD 7.4	Cases = 73.2% female Controls = 74.3% female	NR	Cases Mean MMSE: 16.3 SD 7.4 Controls Mean MMSE: 16.8 SD 7.8	MMSE	A drop in MMSE score of ≥ 2	Once at baseline and once at 92 ± 10 days post-infection	2	NR	Logistic regression	COVID infection: (MV)	No Association: COVID-19 was not associated with cognitive decline.
Guerrero-Berroa 2009	505	USA	Examine specific and/or combined contribution of 4 MMSE domains to prediction of overall cognitive decline on MMSE	MMSE domains - orientation for time, orientation for place, delayed recall, attention	Prospective cohort	Age >60, at least two MMSE assessments, baseline MMSE of 10-25, complete demographic information (age, sex, education)	None reported	NR	Mean 3.2 years SD 2.28	Individuals with only 1 MMSE excluded, otherwise no information on handling of missing data	Mean age 84.94 SD 7.35	79.01% female	NR	Mean MMSE 19.01 SD 4.27	MMSE	Change in MMSE score from baseline to follow-up	NR	NR	NR	Multilevel mixed model	Poor performance on MMSE orientation for time: (MV) Poor performance on MMSE delayed recall: (MV) Poor performance on MMSE attention: (MV) Poor performance on MMSE orientation for place: (MV)	Risk Factors: MMSE domain - orientation for time (poor performance associated with more rapid decline). No Association: MMSE domains delayed recall, attention, orientation for place
Henwood 2017	58	Australia	To report the implications of sarcopenia in nursing home residents and to track its progression among those with no previous diagnosis	Sarcopenia	Prospective cohort	Residents of a nursing home aged ≥ 60 years, residing in a nursing home and could provide consent, self or by proxy given directly by the participants substitute decision maker or verbally to the facility Service Manager	Residents with a pacemaker, end-stage palliative or terminal, has difficult behaviours that would limit data collection, a medical condition or other issues that would limit data collection (e.g. total uncomminicable deafness)	NR	18 months	Excluded if no follow-up after baseline	Mean age 85.6 SD 8.2	70.7% female	NR	Sarcopenic Mean MMSE: 18.6 SD 6.8 Non-sarcopenic Mean MMSE: 21.0 SD 6.1	MMSE	Change in MMSE score from baseline to follow-up	Baseline and 18 month follow-up	1900-01-02	Research assistant ± facility staff member	Repeated ANOVA	Sarcopenia: (MV)	No Association: Upon multivariate analysis, it was found that sarcopenic status was not associated with a significant change in cognitive status.
Hülür 2019	30054	Switzerland	To analyze trajectories of terminal cognitive change in Swiss nursing home residents and to examine if sociodemographic characteristic and functional and mental health factors were associated with decline trajectory	Age Sex Dementia Functional limitations Depression Marital status Living in a private household prior to nursing home Living with others prior to nursing home	Retrospective cohort	Individuals who died, age 65-100 at death	<2 RAI MDS assessments	1998 to 2014	Up to 36 months before death	Excluded if missing data on any key variables	Mean age 87.49	69% female	0.65	NR	CPS	Cognitive trajectories, categorized as: No impairment to mild impairment Moderate impairment to severe impairment Severe impairment	Quarterly	Mean of 4.8 SD 1.96	NR	Latent class growth models	Dementia: (MV) Functional impairments: (MV) Not living in a private household prior to nursing home: (MV) Living with others prior to NH entry: (MV) Marital status: (MV) Older age: (MV) Female sex (gender): (MV) Depression: (MV)	Risk factors: Dementia, increased functional limitations, not living in a private household, living with others, increased age (more likely to have moderate-severe vs. none to mild impairment), younger age (more likley to have severe v. moderate-severe impairment), male sex (gender) (more likely to have moderate-severe vs. none to mild impairment), female sex (gender) (more likely to have severe …
Kwan 2022	2233	Hong Kong	To examine the association between sensory impairment and cognitive decline and the effect of the use of audio-visual aids between sensory impairment and cognitive decline in LTC	Sensory impairment Visual aid use Hearing aid use	Retrospective cohort	Residents aged ≥60 at baseline without severe cognitive impairment at baseline who had stayed in the facilities for more than 3 years	Those with no follow-up data, CPS score of ≥5, resided in LTC for less than 3 years	January 2005 - December 2016	Mean 4.4 SD 0.8 years	Excluded	Mean age 82.1 SD 8.2	68.5% female	0.288	Mean CPS of 1.5 SD 1.2	CPS	Change in CPS from baseline to follow-up	6-12 months	2	Trained professionals	Univariate general linear model (mediation analysis with cognitive decline as dependent variable, hearing and visual impairment as independent variables, mediators were use of hearing and visual aids)	Visual impairment: (MV) Hearing impairment: (MV) Visual aid use: (BV) Hearing aid use: (BV)	Risk factors: Sensory impairment (visual and hearing), hearing aid use Protective factors: Visual aid use
McCusker 2014	246	Canada	To investigate whether the co-occurrence of delirium (full syndrome or subsyndromal delirium), SSD, depression, and dementia is associated with 6-month cognitive decline in a LTC population	Delirium - full syndrome or subsyndromal Dementia Depression	Prospective cohort	Newly admitted and long-term residents age 65+, stratified according to MMSE <10 (severe cognitive impairment) and ≥10 (no severe cognitive impairment)	Unable to communicate in English or French, primary nurse or research assistant did not have time to complete assessments *There are other reasons for exclusion identified in Figure 1 but not described in the paper nor the previous study cited for details of study population	2005-2009	Maximum 6 months	Individuals without at least one follow-up assessment excluded	65-79 = 23% 80-89 = 50% ≥90 = 27%	56% female	0.66	Severe impairment (MMSE 0-9) 27% Moderate impairment (MMSE 10-17) 26% Mild impairment (MMSE 18-23) 24% No impairment (MMSE 24-30) 23%	MMSE	Decline of at least 3 points on MMSE between baseline and follow-up (10% of total score range)	Monthly	NR	Research Assistant	Multivariable log-binomial or poisson model with robust error variance	Subsyndromal delirium: (MV) Dementia: (MV) Full delirium: (MV) Depression: (MV)	This study was underpowered to test the effects of co-occurrence of syndromes, thus the main effects model (Model 1) was used to assess results: Risk Factors: SSD, dementia No association: Full syndromal delirium, depression
Ott 2002	854	USA	To quantify the effect of estrogen use on the rate of cognitive decline among women in US nursing homes	Estrogen use	Retrospective cohort	Women residing in nursing homes ≥ 65 years old with at least 2 MDS assessments, baseline CPS ≤3	Those with contraindications to estrogen use (vegetative state, history of PE, DVT, stroke, Parkinson's, hydrocephalus, brain tumour, Huntington's), and those who are critically ill or nonpermanent nursing home residents	1992 to 1997	Minimum 6 months	Excluded those with no follow-up	Estrogen users: 4% 65-69 years, 29% 70-79 years, 67% ≥ 80 years Non-users: 2% 65-69 years, 19% 70-79 years, 79% ≥ 80 years	100% female	Estrogen users Alzheimers: 12% Estrogen users other dementia: 23% Non-users Alzheimers: 10% Non-users other dementia: 30%	Estrogen users: Intact/mild impairment: 55% Moderate impairment: 45% Non-users: Intact/mild: 47% Moderate: 53%	CPS	An increase of at least 1 point on the CPS from baseline to follow-up	Quarterly	2	NR	Incidence rate ratio; Cox proportional hazards model	Estrogen use: (MV)	No Association: After stratified analysis, estrogen therapy was not associated with a significant reduction in cognitive decline. Although there was a trend toward less cognitive decline in estrogen users particularly among those with baseline minimal cognitive impairment (30% reduction), the difference was not significant.
Pereiro 2021	98	Spain	To measure the cognitive, functional, and affective declines in a care facility after the lockdown in the first wave of the COVID-19 pandemic and explore the role of the lack of social contact during the lockdown in these declines	COVID-19 lockdown CDR status Depression (GDS)	Combined retrospective prospective cohort	Residents aged ≥60 at the "A Veiga" Gerontological Therapeutic Complex who stayed during the entirety of lockdown (3 months) with 3 baseline measurements available pre-lockdown	None reported	2020-03-01	Up to 3 months	Excluded	Mean age 83.41 SD 9.61	62% female	NR	CDR 0 MMSE = 30 (4.75) CDR 0.5 MMSE = 26.44 (5.21) CDR 1 MMSE = 19.95 (0.48) CDR 2 MMSE = 12.48 (6.59) CDR 3 MMSE = 3.92 (5.45)	Spanish MMSE	Change in MMSE from baseline to follow-up	3-6 months	4	Center's interdisciplinary team	Mixed ANOVA analyses with Bonferroni corrections	COVID-19 Lockdown: (MV) CDR status: (MV) Depression (GDS): (MV)	Risk factors: Bonferroni pairwise comparisons showed that the MMSE scores were significantly lower in the third pre-lockdown measurement and in the post-lockdown measurement. Scores were also significantly lower in the mild, moderate, and severe groups than in the normal and questionable CDR levels. No association: Group differences relating to GDS disappeared when the frequency of social contact…
Pérez-Rodríguez 2021	435	Spain	To compare the functional, cognitive, and nutritional status of institutionalized older adults before and after the first wave of the COVID-19 pandemic and assess whether there are differences between those who contracted COVID-19 and those who didn't	COVID-19 lockdown SARS-CoV-2 infection	Retrospective cohort	Residents of the studied nursing homes	Those who were hospitalized or at home during the time of the study	May 21 2020 - June 23rd 2020	4 months	Excluded	Mean age 86.77 SD 8.5	78.4% female	NR	Baseline GDS 1 22 (16.4%) 2–3 20 (14.9%) 4–5 19 (14.2%) 6–7 73 (54.5%) Baseline MEC 0-14 23 (21.1%) 15–19 15 (13.8%) 20–23 17 (15.6%) 24–35 54 (50%) Baseline Pfeiffer’s SPMSQ 0–2 57 (22.7%) 3–4 30 (12%) 5–7 72 (28.7%) 8–10 92 (36.7%)	GDS, Lobo's Mini-Examen Cognoscitivo (MEC), and Pfeiffer's SPMSQ	Change in GDS, MEC, or greater than 3 errors in Pfeiffer's SPMSQ from baseline to follow-up	4 months	2	Hospital geriatric multidisciplinary team	Linear and logistic regression models	COVID-19 Lockdown: (MV) SARS-CoV-2 infection: (BV)	Risk factors: COVID-19 first-wave lockdown No association: SARS-CoV-2 infection
Rapp 2011	313	USA	To examine whether cognitive decline differs in patients with dementia with depression, in comparison to patients with dementia without depression	Dementia Depression Interaction between depression and dementia	Prospective cohort	Nursing home residents aged >54, at least 2 prior MMSE assessments, and complete demographic information available (age, sex, education)	None reported	NR	Up to 36 months (range 3-36 months)	Individuals with only 1 MMSE excluded, otherwise no information on handling of missing data	Mean age 86.99 SD 6.7	83.1% female	0.613	Mean MMSE 21.60 SD 9.89	MMSE	Change in MMSE score from baseline to follow-up	Annual	4	Trained research assistants	Multilevel mixed model	Dementia: (MV) Depression: (MV) History of depression: (MV)	Risk Factors: Dementia, Depression during study, dementia + depression during study. No Association: History of depression.
Ravona-Springer 2010	342	USA	To assess if the association of diabetes with rate of cognitive decline varies with dementia severity	Diabetes status with respect to dementia severity	Prospective cohort	Baseline MMSE 10-30, had at least 1 follow-up assessment, medical records available for review of diabetes status, and had complete demographic data available (age, gender, race, education)	Baseline diagnosis of cerebrovascular disease or neurological or psychiatric disorder affecting cognition (Parkinson's, schizophrenia)	NR	Mean follow-up of 2.95 years SD 1.67	Excluded if no follow-up after baseline	Mean age 85.7 SD 7.3	74.3% female	Dementia severity assessed by Clinical Dementia Rating: not demented (57.0%), questionably demented (17.0%), demented (26.0%)	Mean MMSE 24.76 SD 4.58	MMSE	Change in MMSE score from baseline to follow-up	12 ± 3 months	Mean of 3.61 SD 2.64	NR	Generalized estimating equations	Diabetes: (MV)	Risk Factors: Diabetes was associated with more rapid decline among those with questionable dementia. No diabetes was associated with more rapid decline among those with dementia. No Association: Diabetes not associated with decline in those without dementia.
Ravona-Springer 2011	687	USA	To examine the effects of age on cognitive decline in residents of supportive care facilities, and to determine if this effect differs according to stage of dementia	Age with respect to dementia severity	Prospective cohort	Residents with baseline MMSE between 10 and 30, had at least one follow-up assessment, and had complete data on CDR, age, sex, race, and level of education	Residents with baseline diagnosis of cerebrovascular disease, vascular dementia, non-Alzheimer disease dementing condition, or neurologic or psychiatric disorders affecting cognition (Parkinson's or schizophrenia)	NR	Mean 2.9 years, SD 2.0	Excluded	Mean age 85.2 SD 7.4	75.3% female	Dementia severity assessed by Clinical Dementia Rating: not demented (51.4%), questionably demented (17.6%), demented (31%)	Mean MMSE 23.8 SD 5.7	MMSE	Change in MMSE from baseline to follow-up	Approximately annual intervals (12 +/- 3 months)	Mean of 3.5 SD 1.7	NR	Generalized estimating equations	Older age: (MV)	Risk Factors: Older age was associated with more rapid cognitive decline vs. younger age among those who were questionably demented. Intermediate age was associated was more rapid cognitive decline (vs. younger and older age) in those in the demented group. No Association: Age was not associated with cognitive decline among those with intact cognition.
Robitaille 2015	16804	Canada	To examine the longitudinal relationship between challenging behaviors and cognitive functioning	Dementia-related challenging behaviors (e.g., vocal disruption, physical aggression, repetitive behaviors, and restlessness)	Retrospective cohort	Adults in LTC diagnosed with dementia other than Alzheimer’s disease or Alzheimer’s disease, age >65	None reported	2006 to 2012	2.5 years	36 participants excluded due to missing data on predictor variables	Mean age=84.89 (SD 6.6)	71.5% female	1	Mean CPS 3.13 SD 1.36	CPS	Difference in CPS from baseline to follow-up	Quarterly	Mean of 6 SD 4.16	NR	Multivariate latent growth curve models	Challenging behaviours: (MV)	Risk Factors: On average, individuals who exhibited a steeper increase in cognitive impairment also exhibited a steeper increase in challenging behaviors.
Shim 2006	141	South Korea	To evaluate the effect of depression on the prognosis of dementia in elderly patients	Depression Dementia (non-demented vs Alzheimer's vs vascular dementia)	Prospective cohort	Residents of a geriatric institution aged 65+ Score of 10+ on K-MMSE Score of ≤1 on CDR at baseline Not on drugs that influence cognitive function	Dementia other than AD or VaD	NR	6 months	Excluded	Mean age 74 SD 7.45	61% female	0.326	Mean K-MMSE 21.99 SD 5.24 Mean CDR 0.55 SD 0.34	Korean MMSE (K-MMSE) and Clinical Dementia Rating (CDR)	Within-person change from baseline to follow-up	Single follow-up at 6 months	2	NR	Average change from baseline to 6-months, compared via t-test and ANCOVA	Depression: (BV) Dementia: (MV)	Risk Factors: Those with depression had greater cognitive decline as measured by K-MMSE than those without depression. Among subset with depression at baseline, those with VaD had greatest cognitive decline as measured by both K-MMSE and CDR, followed by those with AD, and those without dementia. No Association: When stratified according to presence of dementia, depression was not associated with…
Sink 2008	3536	United States	To determine the cognitive and functional consequences of dual use cholinesterase inhibitors and the bladder anticholinergics oxybutynin or tolterodine	Dual use of ChIs with/without bladder cholinergics (# of days)	Prospective cohort	Eligible for Indiana Medicaid benefits Aged 65+ Had at least two consecutive prescriptions for a ChI (donepezil, gal- antamine, rivastigmine, or tacrine) Had at least two consecutive NH MDS assessments while continuously taking a ChI	Taking anticholinergic other than oxybutynin or tolterodine	January 1, 2003 to December 31, 2004	Median f/u time: 183 days First assessment = first non-admission RAI-MDS Last assessment = last RAI-MDS assessment before discontinuation of the ChI, initiation of an anticholinergic other than the bladder anti- cholinergics oxybutynin or tolterodine, or December 31, 2004, whichever came first	Excluded	65-74 =10.7% 75-79 =16.9% 80-84 = 28.1% 85-89 = 26.0% ≥90 =18.3%	75.3% female	NR	Cognitively intact (CPS): 10% Moderate impairment (2-4): 37.8% Severe impairment (5-8): 45.7% Very severe (9-10): 6.5%	RAI-MDS Cognition Scale	Change in MDS-COG score between quarterly RAI-MDS assessments	Quarterly	At least two	NR	Repeated measures analysis with piecewise linear regression	Bladder anticholinergic: (MV) Type of anticholinergic: (MV)	No Association: Use of bladder anticholinergics. Specific anticholinergics (oxybutynin or tolterodine).
van der Krogt 2022	86	The Netherlands	To describe the trajectory of symptoms and cognitive/ADL functioning of NH residents in the first three months after a COVID-19 infection	SARS-CoV-2 infection (COVID-19 symptoms)	Retrospective cohort	Those residing in the NH with a positive PCR test for COVID-19 between September 1st 2020 and March 1st 2021, and were alive 4 weeks after the PCR test	Residents in the dying phase, having an indication for palliative terminal care, admission to the NH less than one month before the positive PCR test	September 1st 2020 - March 1st 2021	3 months	Excluded	Mean age 84 SD 8	76.7% female	0.721	Mean CPS of 2.51	CPS	A change of at least 1 point in CPS between follow-ups	1-2 months	4	Elderly care physicians and nursing staff	Wilcoxon signed rank test with Bonferroni correction	SARS-CoV-2 infection: (MV)	No association: More than half of the residents did not develop a deterioration in cognitive functioning following SARS-CoV-2 infection (65.1%). Of the other half who did decline, most residents completely recovered and 14.0%–17.5% maintained a degree of deterioration in ADL, cognitive or social functioning after three months. These pattern remained the same after exploring the impact of dementia…
Watfa 2015	682	France and Italy	To determine the 2-year predictive value of BP and arterial functional parameters on total mortality and cognitive decline	Blood pressure Heart rate Central/peripheral pulse pressure amplification (PPA) Arterial stiffness (carotid femoral pulse wave velocity - cfPWV)	Prospective cohort	Participants who were 80+, institutionalized, and signed informed consent	Severe dementia (MMSE <12) Low level of autonomy (ADL ≤2) Under guardianship Missing arterial stiffness data Refusal/inability to evaluate MMSE Loss to follow-up	January 2007-June 2008	2 years	Excluded	Mean age 87.5 SD 5	81% female	0.15	Mean MMSE 24.1 SD 4.8	GRECO version of MMSE	Patients with a MMSE decrease of more than 3 points after 2 years of follow-up	Annual	3	Medical research team	Logistic regression model analysis	Higher arterial stiffness: (MV) Heart rate: (MV) BP: (MV) PPA: (MV)	Risk Factors: High arterial stiffness Not associated: Heart rate, PPA, BP
Wouters 2020	4624	The Netherlands	To examine associations between cumulative exposure to anticholinergic and sedative medications and cognitive and physical function among aged care home residents	Anticholinergic and sedative medication exposure as measured by DBI (Drug Burden Index)	Retrospective cohort	Residents of Dutch aged care homes ≥ 65 years at the first assessment	Excluded if residents were potential problem drinkers (≥ 5 units of alcohol at a single occasion) or when interRAI-LTCF assessment was not performed	June 2005 and April 2014	NR	Repeatedly measured outcome variables aided to deal with missing data	Mean age 83.6 SD 7.0	73.3% female	0.388	Mean CPS 1.8 SD 1.7	CPS	Change in CPS score from baseline to follow-up	Every 60 days or longer	NR	Trained nursing home staff	Linear mixed model analysis	Drug Burden Index: (MV)	No Association: After adjustment for sex, age, dementia, comorbidity (neurological, psychiatric, cardiovascular, oncological, and pulmonary), fractures, depressive symptoms, and medications excluded from the DBI, associations between a higher DBI and cognitive function were not statistically significant.
Wysocki 2012	224	USA	To investigate whether individuals with hypertension were more susceptible to cognitive decline than non-hypertensive individuals, and if this varies as a function of dementia severity	Hypertension	Prospective cohort	Residents of skilled nursing facilities and assisted living facility with baseline MMSE of 10-30, with at least one follow-up MMSE and assessment	Those in need of acute medical or psychiatric care or those with a diagnosis of cerebrovascular disease or cerebrovascular accident	NR	NR	Excluded if no follow-up after baseline	Mean age 84.89 SD 7.6	77.7% female	Dementia severity assessed by Clinical Dementia Rating: not demented (25.4%), questionably demented (28.1%), demented (47.3%)	Mean MMSE 21.8 SD 5.0	MMSE	Change in MMSE score from baseline to follow-up	Annual	Mean of 4.15 SD 2.21	NR	Linear mixed model analysis	Hypertension: (MV)	Risk Factors: Hypertension was associated with more rapid cognitive decline in those deemed questionably demented. No Association: Hypertension not associated with cognitive decline among those deemed not demented or demented.
Yamada 2016	1989	Czech Republic, Enland, Finland, France, Germany, Isreal, Italy, and the Netherlands	To examine cognitive decline differences in nursing home residents with concurrent vision and hearing impairment (dual-sensory impairment, DSI) and without DSI, and to assess whether social engagement is an effect modifier of that relationship	Dual-sensory impairment (DSI) Social engagement	Prospective cohort	Elderly residents residing in participating nursing homes at the beginning of study, and those admitted in the 3-month enrollment period following initiation were eligible Those with full records on all included baseline variables were included in this analysis	Residents with severe cognitive impairment (CPS = 5, 6) at baseline Residents with temporal unstable health conditions (e.g. end-stage disease, acute episodes, unstable conditions causing pain or impairing mobility and cognition) at baseline	2009-2011	12 months	160 residents died and 285were lost to follow-up by the 6-month assessment, and further 101 died and 321 were lost to follow-up by the 12-month assessment, resulting 4,655 assessments for the 1,989 residents being availablefrom repeated measures. Possible differential attrition was adjusted for by weighting the available information on level of cognitive functions with the inverse probability of …	Mean age 83.3 (11.1 IQR)	72% female	Alzheimer's 6% of sample, other dementia diagnosis 11.2% of sample	Mean CPS 1.5 SD 1.3	Cognitive Performance Scale from InterRAI instrument for Long-Term Care Facilities	Change in CPS score from baseline to follow-up at 1 year	6 months	1900-01-03	NR	Linear reggression analysis with generalized estimation equations	Sensory impairment: (MV) Social engagement: (MV)	Risk Factors: Single or dual sensory impairment; reduced social engagement. The association between sensory impairment and cognitive decline was modified by social engagement, wherein those with sensory impairment (single or dual) had less cognitive decline if they displayed higher levels of social engagement.
Yuan 2022	266001	USA	To identify the trajectories of cognitive impairment and estimate the association between physical frailty, demographic and clinical characteristics at admission and the identified cognitive impairment trajectories	Physical frailty Age Sex Racial minority Rural nursing home Cancer Heart failure Hypertension Diabetes Dementia Stroke Multiple Sclerosis Parkinson's Epilepsy Arthritis Osteoporosis Hip fracture Chronic lung disease Anxiety Depression Pain Antipsychotics Anti-anxiety medications Antidepressants Hypnotics	Retrospective cohort	Residents aged ≥65 at admission, no previous stay in a nursing home in the 90 days before admission, life expectancy of ≥6 months, residing in the nursing home for at least 6 months, MDS 3.0 assessments available at admission, 3 and 6 months, participated in the BIMS on each MDS assessment	Residents admitted for a skilled nursing facility stay	January 1st, 2014 - June 30th, 2016	6 months	Excluded	65 to < 75: 20.3% 75 to < 85: 33.9% > =85: 67.3%	67% female	Non-Alzheimer’s/Other dementia (42.5%) Alzheimer’s Disease (13.8%)	36.7% with severe cognitive impairment	BIMS	Change in BIMS from baseline to follow-up	3 months	3	NR	Group-based trajectory models using the continuous BIMS score	Physical frailty: (MV) Age: (MV) Sex: (MV) Racial minority: (MV) Rural nursing home: (MV) Cancer: (MV) Heart failure: (MV) Hypertension: (MV) Diabetes: (MV) Dementia: (MV) Stroke: (MV) Multiple Sclerosis: (MV) Parkinson's: (MV) Epilepsy: (MV) Arthritis: (MV) Osteoporosis: (MV) Hip fracture: (MV) Chronic lung disease: (MV) Anxiety: (MV) Depression: (MV) Pain: (MV) Antipsychotics: (MV) Anti-anxiety…	Risk factors: Physical frailty, advancing age, racial minorities, rural nursing home, male sex, dementia, stroke, epilepsy, hip fracture, antipsychotics, antidepressants No association: Cancer, heart failure, hypertension, diabetes, multiple sclerosis, Parkinson's disease, arthritis, osteoporosis, chronic lung disease, anxiety disorder, depression, pain, anti-anxiety medication, hypnotics
Zullo 2021	1784	USA	To evaluate the effects of DPP4 inhibitor vs sulfonylurea use on cognitive functioning, altered mental status events, and physical functioning among frail older nursing home residents	DPP4Is - Dipeptidyl peptidase-4 inhibitors SUs - sulphonylureas	Retrospective cohort	Adults age ≥65, long-stay nursing home residents (>100 days in NH) on January 1, 2008 or who became a long-stay resident between January 1, 2008 and September 30, 2010, with continuous enrolment in Medicare fee-for-service Parts A, B and D. Prescribed either DPP4I or SU	Comatose, paralyzed, have cancer, or are in hospice in the 12 months before follow-up began, use of any dose of any glucose-lowering treatment other than metformin in the 6 months before follow-up begins	January 1, 2008 to September 30, 2010	Max 180 days	Censored	Mean age 80 SD 8	DPP4I users = 72% female SU users = 74% female	NR	Mean CPS 3 SD 2	MDS CPS	A increase of 1 point on the MDS CPS	Quarterly	NR	NR	Cox regression model with outcome of time to 1-point increase in CPS, with confounding controlled via propensity score matching	Glucose lowering drugs - DPP4I vs SU: (MV)	No Association: There was no difference in outcome between DPP4I users vs. SU users.
